# Supplementary material
Source: publisher figshare collection journal article supplement (https://acs.figshare.com/ndownloader/files/34895797)
Supplement: Supplementary file 1 [file 34895797]

# Supporting Information

## Facile Morphology Control during Rapid Fabrication of Nanosized Organosilica Particles

Zhinan Fu<sup>a</sup>, Li Li<sup>a\*</sup>, Fen Li<sup>b</sup>, Rizwan Ahmed<sup>a</sup>, Xiaofeng Niu<sup>a</sup>, Dianhua Liu<sup>a\*</sup>,

Xuhong Guo<sup>a,c,d\*</sup>

<sup>a</sup> State Key Laboratory of Chemical Engineering, East China University of Science and Technology,  
200237 Shanghai, P.R. China

<sup>b</sup> School of Chemistry and Molecular Engineering, East China University of Science and Technology,  
200237 Shanghai, P.R. China

<sup>c</sup> International Joint Research Center of Green Energy Chemical Engineering, East China University  
of Science and Technology, 200237 Shanghai, P.R. China

<sup>d</sup> Engineering Research Center of Materials Chemical Engineering of Xinjiang Bingtuan, Shihezi  
University, 832000 Xinjiang, P.R. China

\*Correspondence: lili76131@ecust.edu.cn (L. Li); dhliu@ecust.edu.cn (D. H. Liu);

guoxuhong@ecust.edu.cn (X. H. Guo), Tel/Fax: +86-21-64253491.

**Table S1** Nitrogen sorption analysis of the golf ball-like silica NPs before and after calcination.

|                    | $S_{\text{BET}}$<br>( $\text{m}^2/\text{g}$ ) | Pore size<br>(nm) | Pore volume<br>( $\text{cm}^3/\text{g}$ ) |
|--------------------|-----------------------------------------------|-------------------|-------------------------------------------|
| Before calcination | 2.8                                           | 6.85              | 0.005                                     |
| After calcination  | 239.9                                         | 6.87              | 0.412                                     |

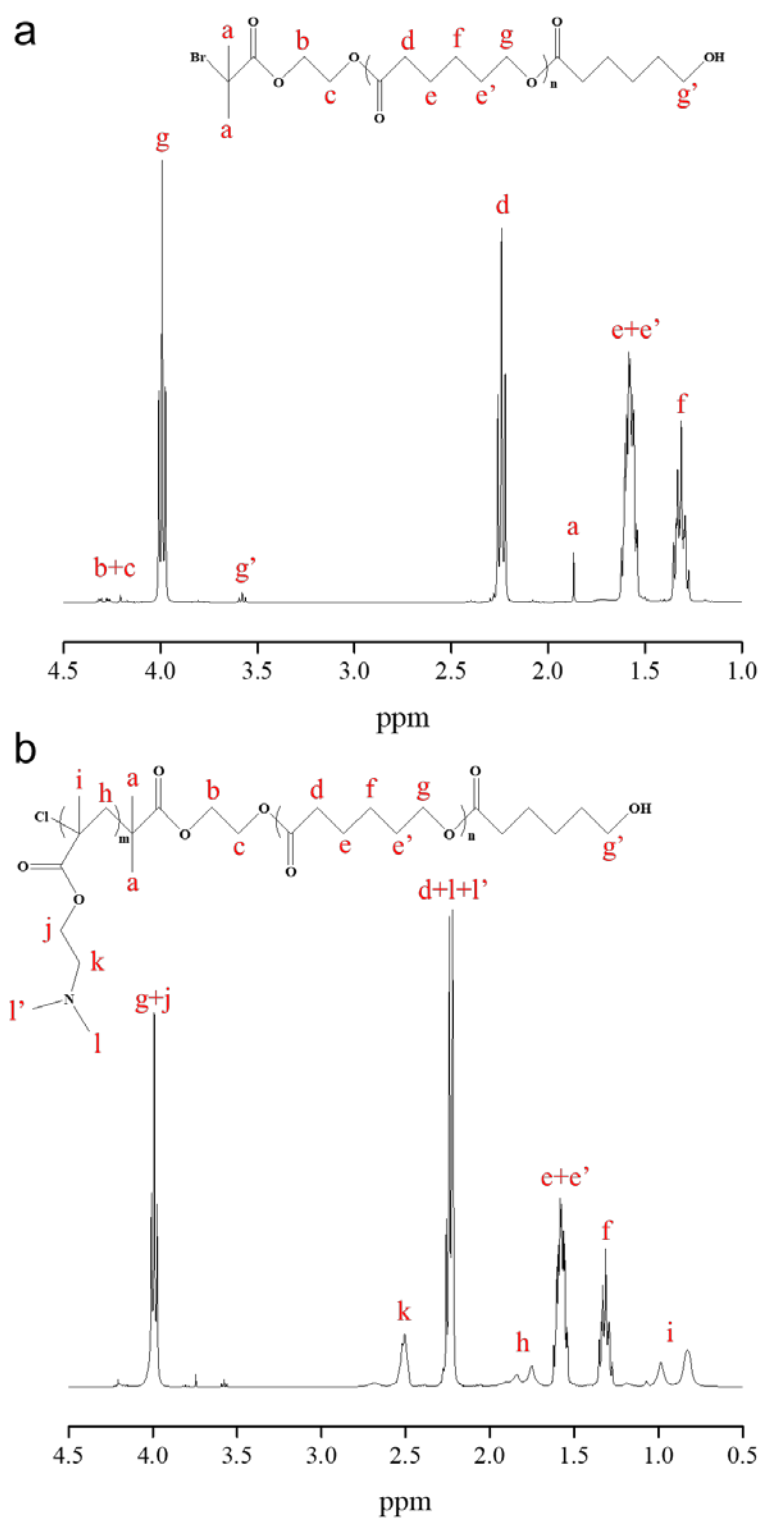

**Figure S1.**  $^1\text{H}$  NMR spectra of (a) PCL-Br and (b) PDMAEMA-*b*-PCL in  $\text{CDCl}_3-d^1$ .

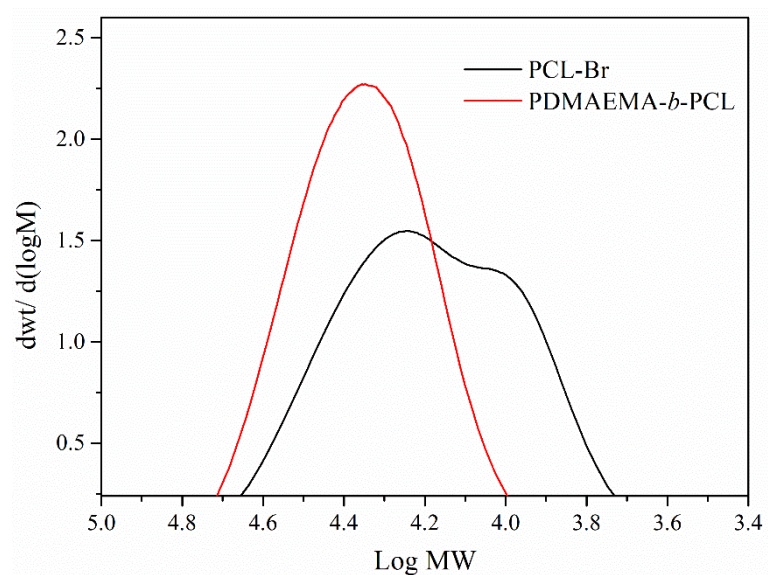

**Figure S2.** GPC curves of PCL-Br ( $M_n = 13442$ ,  $M_w = 17710$ , PDI = 1.32) and PDMAEMA-*b*-PCL ( $M_n = 21110$ ,  $M_w = 24342$ , PDI = 1.15).

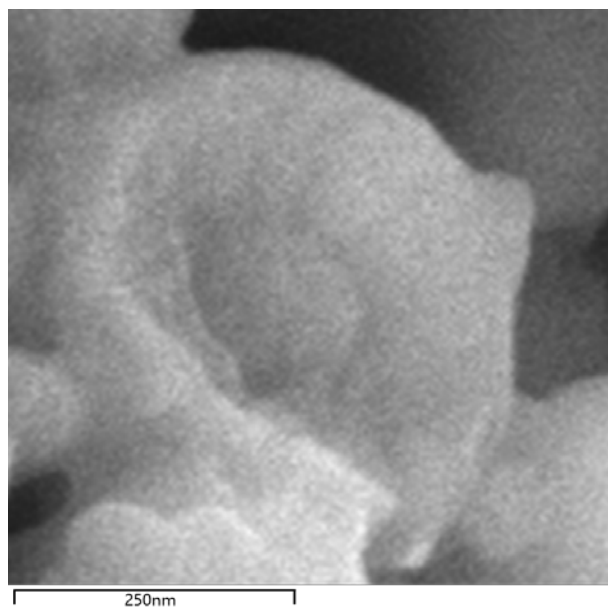

**Figure S3.** FESEM image of the partially crushed organosilica NPs prepared by using pure VTMS as silicon precursor.

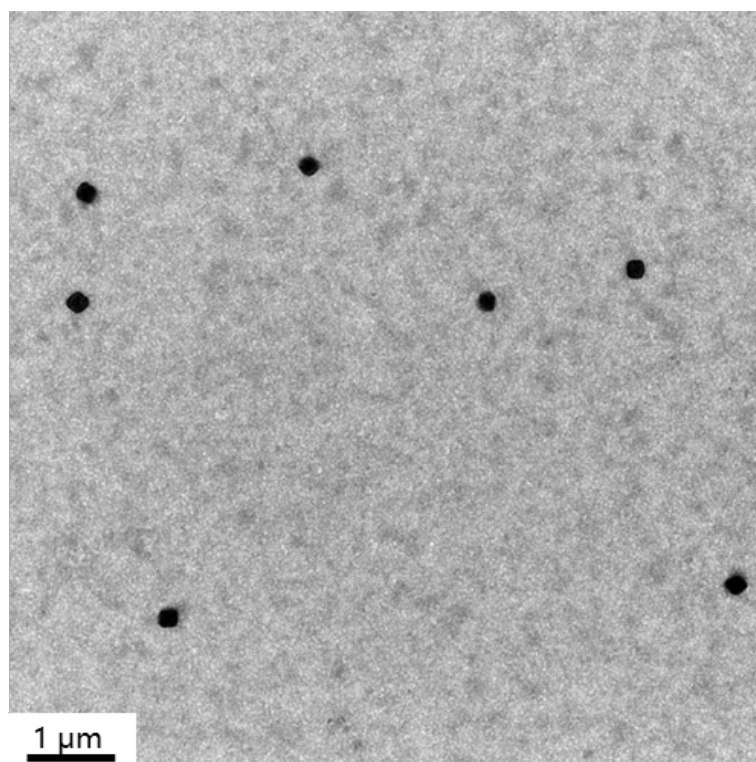

**Figure S4.** TEM image of the cube-shaped organosilica NPs.

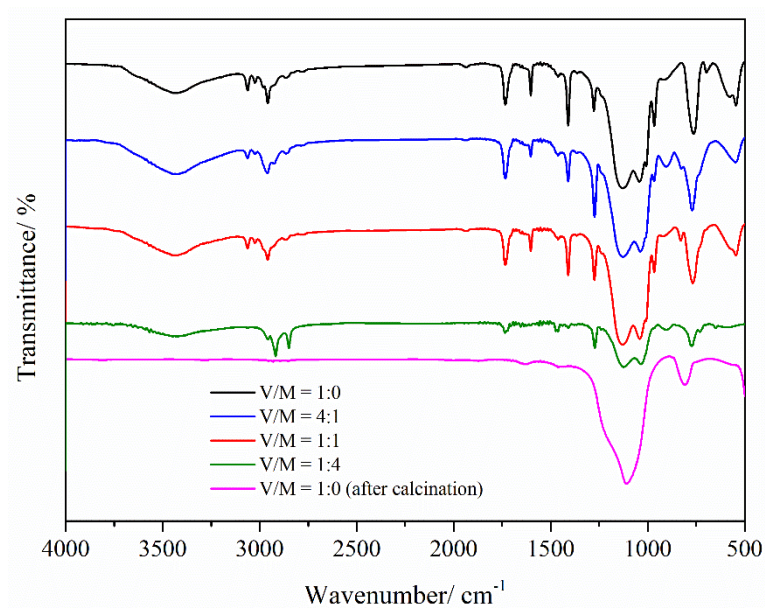

**Figure S5.** FTIR spectra of the organosilica NPs prepared with different weight ratios of MTMS to VTMS before and after calcination.

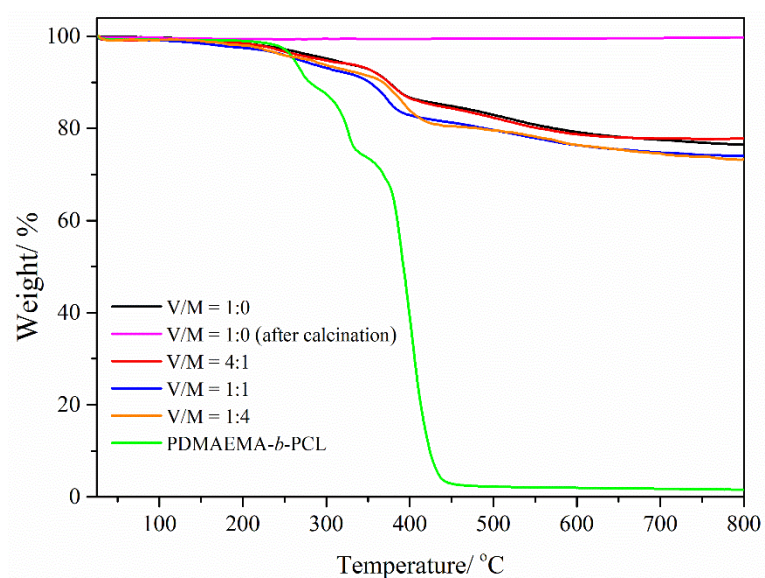

**Figure S6.** TGA of the PDMAEMA-*b*-PCL and the organosilica NPs prepared with different weight ratios of MTMS to VTMS before and after calcination.



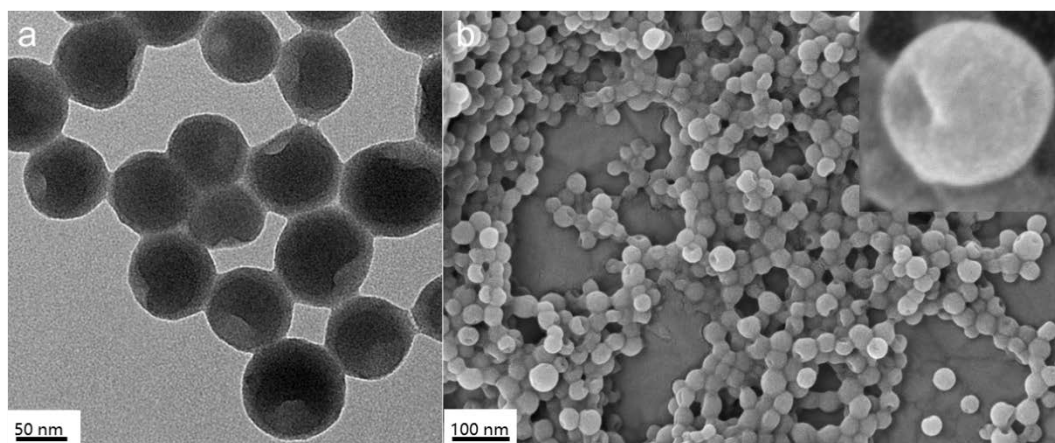

**Figure S7.** (a) TEM and (b) FESEM images of the organosilica NPs prepared at the mixing Re of 14134. The weight ratio of MTMS to PTMS is 1:4.

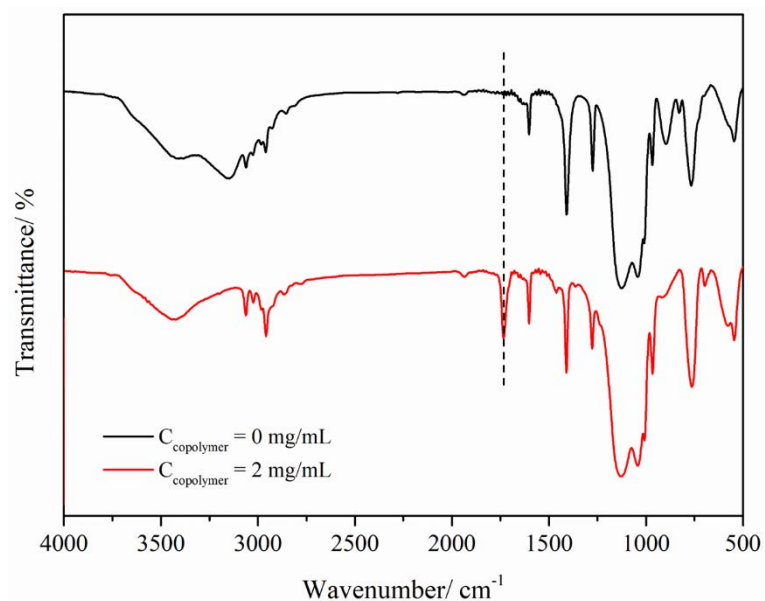

**Figure S8.** FTIR spectra of the organosilica NPs prepared at different concentrations of copolymer.

The pure VTMS is used in the reaction system.
